# Supplementary material for: Adding Protein Context to the Human Protein-Protein Interaction Network to Reveal Meaningful Interactions
Source: PLoS Comput Biol. 2013 Jan 3;9(1):e1002860. doi: 10.1371/journal.pcbi.1002860 (PMC3536619; doi:10.1371/journal.pcbi.1002860)
Supplement: Table S1 — Tissues more than two-fold enriched among proteins in pathways. (XLS) [file pcbi.1002860.s003.xls]

## Sheet: Sheet1
Pathway	Enriched tissue (fold enrichment in brackets)
Adipocyte TarBase	Whole Blood (2.0768417342262953), Uterus (2.506522972206466), Uterus Corpus (2.1103151862464182), Trachea (2.2386018237082066), Smooth Muscle (2.324260355029586), Olfactory Bulb (3.2624584717607967), Placenta (2.6066602316602316), Fetal Lung (2.3758064516129034), Adrenal Gland (3.0012224938875307), Adipocyte (3.282085561497326)
Adipogenesis	Ovary (2.0909794812233837)
Alzheimers Disease	Globus Pallidus (2.1322036111927383)
Androgen receptor signaling pathway	Housekeeping genes (2.48137084398977)
Angiogenesis	Uterus (2.0706059335618634), Uterus Corpus (2.9055064158465176), Skin (2.0519832832319085), Cerebellum (2.2872670807453415), Ciliary Ganglion (2.448342227276704), Fetal Lung (2.289726507713885), Kidney (2.080044593088071), Appendix (2.1555820849539797), Adrenal Gland (2.9751249069841608)
Apoptosis Modulation by HSP70	Atrioventricular Node (2.122478386167147), Adrenal Gland (2.4009779951100243)
B Cell Receptor Signaling Pathway	Tonsil (2.553292148889584)
BMP signalling and regulation	Uterus Corpus (3.3413323782234956), Trachea (2.362968591691996), Salivary Gland (2.9447601010101008), Cerebellum (2.1919642857142856)
Diurnally regulated genes with circadian orthologs	Colon (2.0859289936226473), Trachea (2.658339665653495), Fetal Lung (2.3510584677419355), Housekeeping genes (2.7040579710144925), Adipocyte (2.2085700757575757)
Endochondral Ossification	Uterus Corpus (2.2275549188156636), Trachea (2.57778391820945)
Epithelium TarBase	Trachea (2.011037099312337)
EPO Receptor Signaling	Whole Blood (2.150063718445812), Uterus Corpus (2.0562045404452283), Cerebellum (2.0233516483516483), Ciliary Ganglion (2.165841201052469)
ErbB signaling pathway	Trachea (2.06222713456756), Olfactory Bulb (2.066223698781838)
Estrogen signaling pathway	Trachea (2.126671732522796), Temporal Lobe (2.856649168853893), Subthalamic Nucleus (2.2551974214343273), Olfactory Bulb (2.066223698781838), Cerebellum (3.0687499999999996), Ciliary Ganglion (2.815593561368209), Dorsal Root Ganglion (3.448798521256932), Bone Marrow (2.311446977205154), Atrioventricular Node (2.0163544668587896), Appendix (2.065766164747564)
FAS pathway and Stress induction of HSP regulation	Skin (2.4202879750940465), Atrioventricular Node (2.0680558634449127)
Folate Metabolism	Ovary (2.0064954617800144), Pancreas (2.0131635735865343), Fetal Liver (3.2226194794203495), Fetal Lung (2.74663338453661), Kidney (2.278144078144078)
FSH signaling pathway	Adrenal Gland (2.036543835137967)
Heart Development	Pancreas (2.2419321614940952)
Hedgehog Signaling Pathway	Housekeeping genes (2.02804347826087)
Hypertrophy Model	Uterus (2.1166193987521273), Uterus Corpus (4.009598853868194), Trachea (2.835562310030395), Olfactory Bulb (2.5827796234772977), Pancreas (2.8184290030211483), Fetal Lung (3.009354838709678), Adrenal Cortex (2.5967988865692417)
Hypothetical Network for Drug Addiction	Cerebellum (2.465959821428571), Caudate Nucleus (2.035516873545384)
IL-3 Signaling Pathway	Bone Marrow (2.0546195352934697)
IL-4 signaling pathway	Whole Blood (2.1277447179083127)
IL-5 signaling pathway	Ovary (2.5281842818428184), Olfactory Bulb (2.066223698781838), Ciliary Ganglion (2.346327967806841), Bone Marrow (2.5425916749256694), Housekeeping genes (2.02804347826087)
IL-6 signaling pathway	Ovary (2.4077945541360175)
IL-7 signaling pathway	Whole Blood (2.2360662671836447), Thymus (2.2924505119453924)
IL-9 signaling pathway	Whole Blood (2.260728762777582), Tonsil (2.621683902877698), Thymus (2.3879692832764503), Housekeeping genes (2.02804347826087)
Keap1-Nrf2 Pathway	Trachea (3.2718026654196866), Olfactory Bulb (2.3841042678251982), Fetal Liver (2.342596467732485), Adipocyte (2.3984471410942)
Kit receptor signaling pathway	Bone Marrow (2.0546195352934697)
Osteoblast Signaling	Uterus Corpus (4.773331968890708), Trigeminal Ganglion (2.295804109757598), Skin (2.2474102625873282), Ovary (3.611691831204026), Olfactory Bulb (2.2138111058376837), Ciliary Ganglion (4.022276516240299), Dorsal Root Ganglion (2.4634275151835223), Fetal Thyroid (2.4588824459673173), Atrioventricular Node (2.880506381226842), Appendix (4.131532329495128)
p38 MAPK Signaling Pathway	Tonsil (2.2207204824375792)
Physiological and Pathological Hypertrophy of the Heart	Trachea (2.0254016500217107), Temporal Lobe (2.0404636920384953), Pons (2.141643709825528), Cerebellum (2.5051020408163263), Globus Pallidus (3.122155287817938), Caudate Nucleus (2.326304998337582), Housekeeping genes (2.8972049689440995)
Selenium Pathway	Ovary (2.1068202348690153), Fetal Liver (3.5529379760609356), Fetal Lung (2.507795698924731), Kidney (2.591388888888889)
Senescence and Autophagy	Uterus Corpus (2.1172799228346904)
Serotonin HTR1 Group and FOS Pathway	Bone Marrow (2.4474144464525156), Housekeeping genes (2.385933503836317)
Serotonin Receptor 2 and ELK-SRF/GATA4 signaling	Temporal Lobe (2.550579615048119), Cerebellum (2.1919642857142856), Housekeeping genes (3.0420652173913045)
Serotonin Receptor 2 and STAT3 Signaling	Whole Blood (2.4662495593937255), Trachea (3.5444528875379935), Trigeminal Ganglion (2.0088285960378984), Tongue (2.1279653284671536), Tonsil (2.0973471223021583), Temporal Lobe (2.0404636920384953), Superior Cervical Ganglion (2.677669345579793), Skeletal Muscle (3.737580128205128), Liver (2.4489849492474622), Leukemia Lymphoblastic (MOLT-4) (2.3982005141388174), Ovary (6.320460704607046), Olfac…
Serotonin Receptor 4/6/7 and NR3C Signaling	Testis Leydig Cell (2.362968591691996), Testis (2.1429087090634638), Temporal Lobe (2.2671818800427728), Subthalamic Nucleus (2.08814576058734), Spinal Cord (2.0358835266242674), Ovary (2.80909364649202), Olfactory Bulb (2.2958041097575976), Ciliary Ganglion (3.128437290409121), Dorsal Root Ganglion (2.8739987677141094), Globus Pallidus (2.081436858545292), Bone Marrow (2.0546195352934697), Appen…
Signaling of Hepatocyte Growth Factor Receptor	Olfactory Bulb (2.066223698781838)
Squamous cell TarBase	Trachea (2.7221398176291793), Smooth Muscle (2.3552504930966474), Pancreas (2.0292688821752267), Placenta (2.0891196911196914), Housekeeping genes (2.0767165217391303), Adipocyte (2.045395721925134)
SREBF and miR33 in cholesterol and lipid homeostasis	Pons (2.141643709825528), Fetal Liver (2.5378128400435256), Adrenal Gland (2.851161369193154), Adipocyte (2.728233622994652), Adrenal Cortex (3.245998608211552)
TGF Beta Signaling Pathway	Fetal Lung (2.229151732377539)
TWEAK Signaling Pathway	Lymph Node (2.002876894671304)
Type II interferon signaling (IFNG)	Tonsil (4.5302697841726625), Thymus (2.8018839590443685), Lymph Node (2.0188999098286744), Fetal Liver (3.0453754080522306), Bone Marrow (3.698315163528246)
Vitamin B12 Metabolism	Ovary (2.430946424848864), Fetal Liver (3.123461956976647), Fetal Lung (3.03829094292804), Kidney (2.5300542406311637)
