# Supplementary material for: Adding Protein Context to the Human Protein-Protein Interaction Network to Reveal Meaningful Interactions
Source: PLoS Comput Biol. 2013 Jan 3;9(1):e1002860. doi: 10.1371/journal.pcbi.1002860 (PMC3536619; doi:10.1371/journal.pcbi.1002860)
Supplement: Table S4 — Comprehensive BET and lung PPI networks connecting viral proteins with cytokine-related second layer proteins on shortest paths between viral proteins and gene products upregulated upon influenza infection. (XLS) [file pcbi.1002860.s006.xls]

## Sheet: Sheet1
New comprehensive network
Viral proteins	host factor	cytokine-related interactor	tissues
PB1, PB2	BHLHE40	STAT3	[lung]
PA	CDC42EP4	CDC42	[lung]
PB2	CREB3	TAP1	[lung]
NP	MAGED1	PJA1	[lung]
NP	MAGED1	IRAK1	[lung]
NP	MAGED1	HSPB1	[lung]
NP	MAGED1	TOLLIP	[lung]
PB1, PB2, M2	RBPMS	EWSR1	[lung]
PB1, PB2, M2	RBPMS	TOLLIP	[lung]
PA	RNF5	UBE2D2	[lung]
PA	RNF5	UBE2D4	[lung]
PA	RNF5	PXN	[lung]
PA	RNF5	UBE2V1	[lung]
PA	RNF5	UBE2Z	[lung]
PA	RNF5	UBE2E3	[lung]
PB1	SIAH1	STAT3	[lung]
PB1	SIAH1	MYD88	[lung]
PB1	SIAH1	UBE2E3	[lung]
PB1	SIAH1	UBE2D2	[lung]
PB1	TRIP6	SRC	[lung]
PB1	TRIP6	NEDD9	[lung]
NS2	AIMP2	STUB1	[lung, bet]
PB1, PB2	BHLHE40	TOLLIP	[lung, bet]
PB2	CREB3	JUN	[lung, bet]
PB2	CREB3	BCL2L1	[lung, bet]
NS1, M1	PRKRA	SHC1	[lung, bet]
NS1, M1	STAU1	CDC42	[lung, bet]
NS1, M1	STAU1	RAC1	[lung, bet]
PB1	TRIP6	PXN	[lung, bet]
NS2	AIMP2	PPP2R1A	[bet]
PB1, PB2	BHLHE40	SUMO1	[bet]
PA	NDUFS3	MYC	[bet]
NS1, M1	PRKRA	RB1	[bet]
NS1, M1	STAU1	RPS6	[bet]
NS1, M1	STAU1	RPL6	[bet]
NS1, M1	STAU1	HDAC1	[bet]
NS1, M1	STAU1	UBE2D3	[bet]
NS1, M1	STAU1	FLNB	[bet]
PB1	TRIP6	PTK2	[bet]
PB1	TRIP6	FLNB	[bet]
